# Supplementary material
Source: PubMed Central journal article supplement (PMC6218860)
Supplement: ASN.2018010091SupplementaryData1.pdf [file ASN.2018010091SupplementaryData1.pdf]

**SUPPLEMENTAL MATERIAL****Supplemental Material Contents****Methods**

|                        |   |
|------------------------|---|
| Subgroup Analyses..... | 1 |
|------------------------|---|

**Results**

|                                                                                                                                      |   |
|--------------------------------------------------------------------------------------------------------------------------------------|---|
| Supplemental Table 1. Reduction in UP/C From Baseline to Week 8 by Dose Group (Efficacy Evaluable Set).....                          | 3 |
| Supplemental Table 2. MMRM Analysis of UP/C at Baseline and Week 8, All Doses (Full Analysis Set) .....                              | 4 |
| Supplemental Table 3. Proportion of Patients Who Achieved FPRE at Week 8 (Efficacy Evaluable Set).....                               | 5 |
| Supplemental Table 4. Changes in Select Laboratory and Safety Parameters During the Double-blind Period (Safety Evaluable Set) ..... | 6 |
| Supplemental Table 5. Diuretic Use During the Double-blind Period (Full Analysis Set) .....                                          | 7 |
| Supplemental Table 6. Change in Diuretic Treatment During the Double-blind Period (Full Analysis Set) .....                          | 8 |
| Supplemental Table 7. Changes in UP/C for Patient Subgroups (Efficacy Evaluable Set) .....                                           | 9 |

**METHODS***Subgroup Analyses*

Prespecified analyses were performed on patient subgroups of the efficacy evaluable set population stratified by age (>18 vs ≤18 years), baseline UP/C (≥3.5 vs <3.5 g/g), sex, and baseline severity of kidney disease (eGFR: >90, >60–90, >45–60, and 30–45 mL/min/1.73m<sup>2</sup>). Analyses of subgroups based on race and blood pressure were also performed. The treatment group geometric least squares mean percent change from baseline in UP/C was calculated for both treatment groups within each patient subgroup. Analysis of covariance models for change in natural log UP/C included baseline UP/C as a covariate and effects for treatment, cohort, prognostic factor, and treatment by prognostic factor interaction. Descriptive statistics and 95% confidence intervals were calculated for each subgroup.

**RESULTS****Supplemental Table 1. Reduction in UP/C From Baseline to Week 8 by Dose Group (Efficacy Evaluable Set)**

| Sparsentan Dose Cohort | UP/C Ratio, Median (Range)<br>Week 0 |                                 | UP/C Ratio, Median (Range)<br>Week 8 |                                 | % Reduction From Baseline<br>(95% CI) <sup>a</sup> |                                   | P Value |
|------------------------|--------------------------------------|---------------------------------|--------------------------------------|---------------------------------|----------------------------------------------------|-----------------------------------|---------|
|                        | Irbesartan<br>(n=32)                 | Sparsentan<br>(n=64)            | Irbesartan<br>(n=32)                 | Sparsentan<br>(n=64)            | Irbesartan<br>(n=32)                               | Sparsentan<br>(n=64)              |         |
| All doses              | 3.27<br>(0.88, 10.73)<br>[n=32]      | 3.62<br>(0.43, 18.66)<br>[n=64] | 2.41<br>(0.43, 10.19)<br>[n=32]      | 1.98<br>(0.12, 14.47)<br>[n=64] | -18.5<br>(-34.6, 1.7)<br>[n=32]                    | -44.8<br>(-52.7, -35.7)<br>[n=64] | 0.006   |
| 400 and 800 mg         | 2.97<br>(0.88, 10.73)<br>[n=25]      | 3.53<br>(0.43, 18.66)<br>[n=51] | 2.39<br>(0.43, 10.19)<br>[n=25]      | 1.90<br>(0.12, 14.47)<br>[n=51] | -19.0<br>(-38.0, 5.9)<br>[n=25]                    | -47.4<br>(-56.3, -36.9)<br>[n=51] | 0.011   |
| 200 mg                 | 4.86<br>(0.98, 8.03)<br>[n=7]        | 3.71<br>(1.50, 10.15)<br>[n=13] | 3.64<br>(1.45, 6.69)<br>[n=7]        | 2.06<br>(0.59, 14.38)<br>[n=13] | -15.0<br>(-41.8, 24.2)<br>[n=7]                    | -33.1<br>(-49.3, -11.6)<br>[n=13] | 0.298   |
| 400 mg                 | 2.85<br>(1.10, 10.73)<br>[n=17]      | 3.71<br>(1.25, 18.66)<br>[n=21] | 2.38<br>(0.43, 10.19)<br>[n=17]      | 1.73<br>(0.28, 12.34)<br>[n=21] | -28.1<br>(-47.5, -1.6)<br>[n=17]                   | -52.7<br>(-64.3, -37.2)<br>[n=21] | 0.056   |
| 800 mg                 | 3.30<br>(0.88, 9.76)<br>[n=8]        | 3.23<br>(0.43, 14.68)<br>[n=30] | 3.02<br>(1.11, 8.37)<br>[n=8]        | 2.09<br>(0.12, 14.47)<br>[n=30] | -9.3<br>(-45.3, 50.3)<br>[n=8]                     | -41.3<br>(-54.4, -24.4)<br>[n=30] | 0.127   |

<sup>a</sup>Geometric least squares mean percent change from baseline.

P values from analysis of covariance.

Abbreviations: CI, confidence interval; UP/C, urinary protein-to-creatinine ratio.

**Supplemental Table 2. MMRM Analysis of UP/C at Baseline and Week 8, All Doses (Full Analysis Set)**

| UP/C Ratio, Median (Range)<br>Week 0 |                                 | UP/C Ratio, Median (Range)<br>Week 8 |                                 | Comparison of the Baseline (Week 0) Adjusted Week 8 UP/C Values Between Sparsentan and Irbesartan (95% CI) <sup>a</sup> |                |
|--------------------------------------|---------------------------------|--------------------------------------|---------------------------------|-------------------------------------------------------------------------------------------------------------------------|----------------|
| Irbesartan<br>(n=36)                 | Sparsentan<br>(n=73)            | Irbesartan<br>(n=36)                 | Sparsentan<br>(n=73)            | Sparsentan<br>(n=73)<br>vs Irbesartan<br>(n=36)                                                                         | <i>P</i> Value |
| 3.12<br>(0.88, 10.73)<br>[n=36]      | 3.61<br>(0.43, 18.66)<br>[n=72] | 2.41<br>(0.43, 10.19)<br>[n=32]      | 1.94<br>(0.12, 14.47)<br>[n=66] | 0.69<br>(0.52, 0.91)                                                                                                    | 0.010          |

<sup>a</sup>A mixed model repeated measures (MMRM) analysis using restricted maximum likelihood (REML) with the natural log(UP/C) at Week 0 and Week 8 as the dependent variable, treatment, cohort, visit, and treatment-by-visit interaction as fixed effects, and subject as a random effect was conducted in this analysis. The ratio for the difference from Week 8 to Week 0 is generated by  $\exp[\text{LSmean of natural log(UP/C) at Week 8} - \text{LSmean of natural log(UP/C) at Week 0 for Sparsentan} - \text{LSmean of natural log(UP/C) at Week 8} - \text{LSmean of natural log(UP/C) at Week 0 for Irbesartan}]$ . 95% CI of ratio and *P* value are derived from the contrast of the treatments and visits within the MMRM model.

Abbreviations: CI, confidence interval; UP/C, urinary protein-to-creatinine ratio.

**Supplemental Table 3. Proportion of Patients Who Achieved FPRE at Week 8 (Efficacy Evaluable Set)**

| Dose Cohort       | Patients, n/N (%)    |                      | P Value <sup>a</sup> |
|-------------------|----------------------|----------------------|----------------------|
|                   | Irbesartan<br>(n=32) | Sparsentan<br>(n=64) |                      |
| All doses         | 3/32 (9.4)           | 18/64 (28.1)         | 0.040                |
| 400 mg and 800 mg | 3/25 (12.0)          | 16/51 (31.4)         | 0.092                |
| 200 mg            | 0/7 (0)              | 2/13 (15.4)          | 0.521                |
| 400 mg            | 3/17 (17.7)          | 8/21 (38.1)          | 0.282                |
| 800 mg            | 0/8 (0)              | 8/30 (26.7)          | 0.164                |

<sup>a</sup>Discrete outcomes were compared using a Fisher exact test.

Abbreviation: FPRE, focal segmental glomerular sclerosis (FSGS) partial remission endpoint; n/N, number achieving endpoint / number assessed.

**Supplemental Table 4. Changes in Select Laboratory and Safety Parameters During the Double-blind Period (Safety Evaluable Set)**

| Parameter                     | Irbesartan<br>(n=36) |               | Sparsentan, All Doses<br>(n=73) |               |
|-------------------------------|----------------------|---------------|---------------------------------|---------------|
|                               | Baseline             | Week 8        | Baseline                        | Week 8        |
| Body weight, kg               | 82.1 (22.1)          | 81.6 (22.4)   | 81.4 (22.4)                     | 81.1 (22.8)   |
| Serum albumin, g/dL           | 3.54 (0.72)          | 3.61 (0.58)   | 3.56 (0.71)                     | 3.6 (0.72)    |
| Serum creatinine, mg/dL       | 1.22 (0.56)          | 1.22 (0.58)   | 1.19 (0.53)                     | 1.25 (0.59)   |
| Serum potassium, mmol/L       | 4.23 (0.44)          | 4.47 (0.36)   | 4.13 (0.37)                     | 4.43 (0.43)   |
| Hemoglobin, g/dL              | 12.9 (2.1)           | 12.7 (2.1)    | 13.3 (1.9)                      | 12.3 (2.0)    |
| Hematocrit, %                 | 39.4 (5.9)           | 39.0 (5.4)    | 40.2 (5.6)                      | 37.3 (6.0)    |
| ALT, U/L                      | 24.3 (13.9)          | 23.1 (10.9)   | 24.2 (15.1)                     | 20.8 (12.2)   |
| AST, U/L                      | 26.1 (14.7)          | 24.5 (10.2)   | 23.9 (11.7)                     | 22.1 (11.1)   |
| NT-proBNP, pg/mL <sup>a</sup> | 202.3 (408.3)        | 125.4 (116.5) | 139.1 (128.9)                   | 146.1 (285.1) |

Data presented as mean (standard deviation) and analyzed using descriptive statistics.

<sup>a</sup>Based on the efficacy analysis set; sparsentan (n = 64) and irbesartan (n = 32).

Abbreviations: ALT, alanine aminotransferase; AST, aspartate aminotransferase; NT-proBNP, N-terminal pro-B-type natriuretic peptide.

**Supplemental Table 5. Diuretic Use During the Double-blind Period (Full Analysis Set)**

| <b>Diuretic</b>     | <b>Patients, n (%)</b>       |                                             |
|---------------------|------------------------------|---------------------------------------------|
|                     | <b>Irbesartan<br/>(n=36)</b> | <b>Sparsentan,<br/>All Doses<br/>(n=73)</b> |
| Thiazide            | 6 (16.7)                     | 5 (6.8)                                     |
| Hydrochlorothiazide | 4 (11.1)                     | 3 (4.1)                                     |
| Chlorthalidone      | 0                            | 1 (1.4)                                     |
| Metolazone          | 2 (5.6)                      | 1 (1.4)                                     |
| Loop                | 8 (22.2)                     | 26 (35.6)                                   |
| Furosemide          | 8 (22.2)                     | 25 (34.2)                                   |
| Bumetanide          | 0                            | 1 (1.4)                                     |

Data analyzed using descriptive statistics.

**Supplemental Table 6. Change in Diuretic Treatment During the Double-blind Period (Full Analysis Set)**

| Diuretic                | Patients, n (%)      |                                    |
|-------------------------|----------------------|------------------------------------|
|                         | Irbesartan<br>(n=36) | Sparsentan,<br>All Doses<br>(n=73) |
| All diuretics           |                      |                                    |
| New or increased        | 4 (11.1)             | 8 (11.0)                           |
| Reduced                 | 1 (2.8)              | 1 (1.4)                            |
| Thiazide <sup>a</sup>   |                      |                                    |
| New or increased        | 3 (8.3)              | 1 (1.4)                            |
| Reduced                 | 0 (0.0)              | 1 (1.4)                            |
| Furosemide <sup>b</sup> |                      |                                    |
| New or increased        | 1 (2.8)              | 7 (9.6)                            |
| Reduced                 | 1 (2.8)              | 0 (0.0)                            |

Data analyzed using descriptive statistics.

<sup>a</sup>Thiazides included hydrochlorothiazide, chlorthalidone, and metolazone.

<sup>b</sup>No other loop diuretics change during the double-blind period.

**Supplemental Table 7. Changes in UP/C for Patient Subgroups (Efficacy Evaluable Set)**

| Subgroup                         | Patients, n<br>Irbesartan/<br>Sparsentan | Geometric LS Mean % Change From Baseline to Week 8<br>(95% CI) |                                   | Interaction<br>P Value |
|----------------------------------|------------------------------------------|----------------------------------------------------------------|-----------------------------------|------------------------|
|                                  |                                          | Irbesartan<br>(n=32)                                           | Sparsentan, All Doses<br>(n=64)   |                        |
| Age                              |                                          |                                                                |                                   | 0.921                  |
| >18 y                            | 24/52                                    | -12.1 (-30.6, 11.5)                                            | -40.7 (-49.3, -30.6) <sup>a</sup> |                        |
| ≤18 y                            | 8/12                                     | -41.1 (-72.4, 25.5)                                            | -62.9 (-78.2, -36.9) <sup>a</sup> |                        |
| Sex                              |                                          |                                                                |                                   | 0.556                  |
| Male                             | 18/37                                    | -20.0 (-39.5, 5.8)                                             | -41.1 (-51.3, -28.6) <sup>a</sup> |                        |
| Female                           | 14/27                                    | -8.0 (-37.6, 35.6)                                             | -50.1 (-61.8, -34.7) <sup>a</sup> |                        |
| Race                             |                                          |                                                                |                                   | 0.477                  |
| White                            | 23/51                                    | -21.1 (-39.6, 3.1)                                             | -43.3 (-52.6, -32.1) <sup>a</sup> |                        |
| Black/African American           | 6/6                                      | -26.6 (-74.8, 113.9)                                           | -56.3 (-85.2, 29.1)               |                        |
| Other                            | 3/7                                      | 35.7 (-24.8, 144.7)                                            | -49.7 (-62.9, -31.8) <sup>a</sup> |                        |
| Baseline UP/C                    |                                          |                                                                |                                   | 0.207                  |
| ≥3.5 g/g                         | 14/33                                    | -29.3 (-46.9, -5.9) <sup>a</sup>                               | -39.7 (-50.0, -27.2) <sup>a</sup> |                        |
| <3.5 g/g                         | 18/31                                    | -10.8 (-36.4, 25.2)                                            | -46.0 (-58.3, -30.0) <sup>a</sup> |                        |
| Baseline eGFR <sup>b</sup>       |                                          |                                                                |                                   | 0.624                  |
| >90 mL/min/1.73m <sup>2</sup>    | 6/16                                     | -14.6 (-59.0, 78.1)                                            | -57.7 (-72.4, -35.0) <sup>a</sup> |                        |
| >60–90 mL/min/1.73m <sup>2</sup> | 11/18                                    | -42.0 (-61.1, -13.6) <sup>a</sup>                              | -37.2 (-52.7, -16.7) <sup>a</sup> |                        |
| >45–60 mL/min/1.73m <sup>2</sup> | 7/12                                     | -4.0 (-45.4, 68.9)                                             | -42.5 (-62.7, -11.3) <sup>a</sup> |                        |
| 30–45 mL/min/1.73m <sup>2</sup>  | 6/16                                     | 21.5 (-30.5, 112.4)                                            | -39.1 (-54.8, -18.1) <sup>a</sup> |                        |



---

|              |       |                    |                                   |       |
|--------------|-------|--------------------|-----------------------------------|-------|
| Baseline BP  |       |                    |                                   | 0.981 |
| Hypertensive | 8/27  | -4.4 (-42.7, 59.6) | -46.6 (-62.0, -25.0) <sup>a</sup> |       |
| Normotensive | 24/37 | -21.3 (-38.8, 1.1) | -48.1 (-57.5, -36.6) <sup>a</sup> |       |

---

Data reported as mean change (95% CI). For the interaction *P* value, an analysis of covariance model was fitted for the natural log of change from baseline in UP/C with the natural log of baseline UP/C as covariate and effects for treatment, cohort, prognostic factor, and treatment by prognostic factor interaction.

<sup>a</sup>*P*<0.05.

<sup>b</sup>*n*=92.

Abbreviations: BP, blood pressure; CI, confidence interval; eGFR, estimated glomerular filtration rate; LS, least squares; UP/C, urine protein-to-creatinine ratio.
