# Supplementary material
Source: PubMed Central journal article supplement (PMC6218860)
Supplement: ASN.2018010091SupplementaryData2.pdf [file ASN.2018010091SupplementaryData2.pdf]

## **SIGNIFICANCE STATEMENT**

Currently, no US Food and Drug Administration-approved therapies are available for the treatment of primary FSGS. Sparsentan is a dual endothelin type A (ET<sub>A</sub>) and angiotensin II type 1 (AT<sub>1</sub>) receptor antagonist for oral administration. This article describes findings from a phase 2, 8 week, randomized, double-blind trial of sparsentan versus an active comparator (AT<sub>1</sub> receptor blocker irbesartan) in patients with primary FSGS. Patients achieved significantly greater reductions in proteinuria with sparsentan compared with irbesartan over 8 weeks, without an increase in adverse events. Thus, sparsentan may provide a new therapeutic option for reduction in proteinuria in patients with primary FSGS; additional studies with longer follow-up are needed.
